# Supplementary material
Source: PubMed Central journal article supplement (PMC2889739)

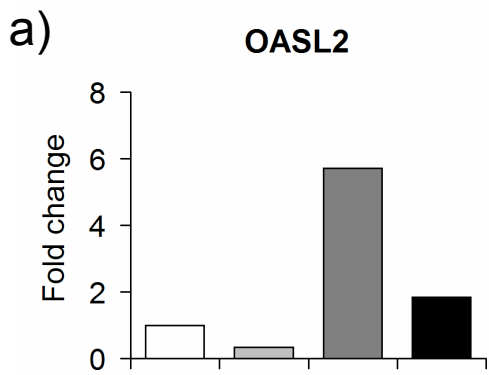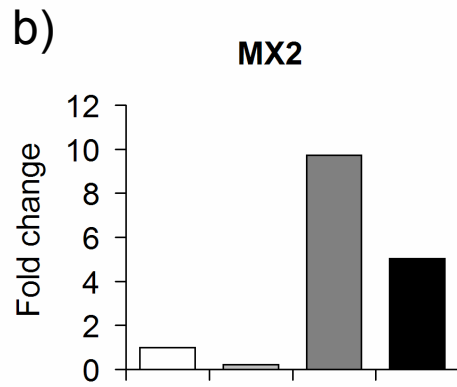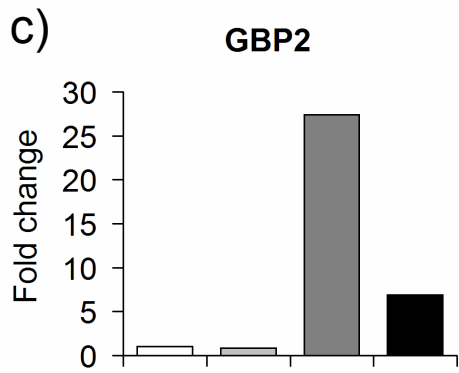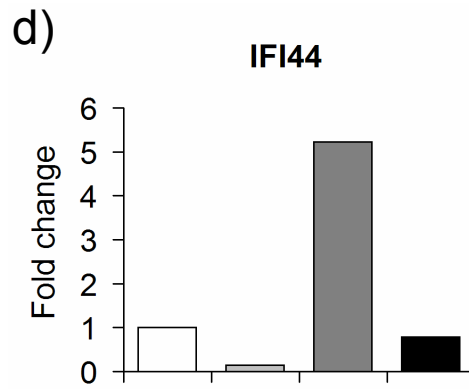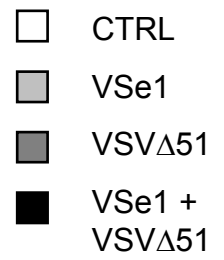

Supplement: mt201067x3.pdf [file mt201067x3.pdf]

a)

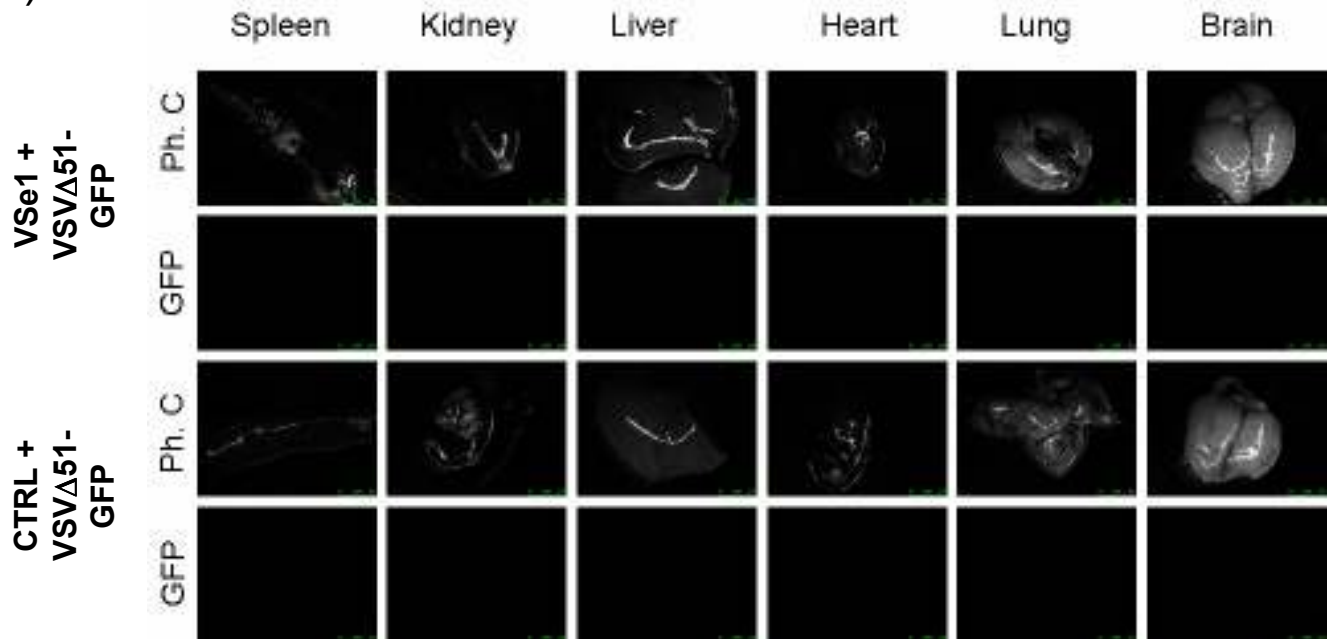

b)

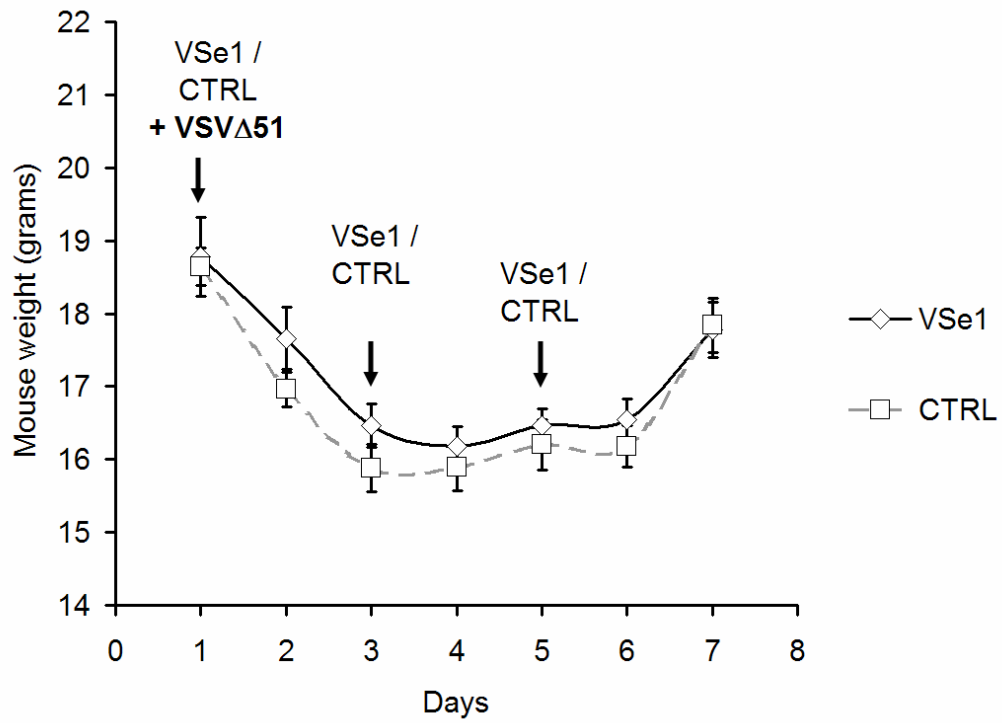

Supplement: mt201067x4.pdf [file mt201067x4.pdf]
